# Supplementary material
Source: publisher figshare collection journal article supplement (https://acs.figshare.com/ndownloader/files/11065256)
Supplement: Supplementary file 1 [file 11065256]

**Supporting Information for:**

**Suppression of Auger Recombination in**

**Nanocrystals via Ligand-Assisted Wave Function**

**Engineering in Reciprocal Space**

Marco Califano\*

*Pollard Institute, School of Electronic and Electrical Engineering, University of Leeds, Leeds LS2  
9JT, United Kingdom*

E-mail: m.califano@leeds.ac.uk

---

\*To whom correspondence should be addressed

# Model Ligand Parameters

As the electronic structure calculations are performed in reciprocal space, Eq. (1) needs to be Fourier transformed into<sup>1</sup>

$$v(\mathbf{q}) = \alpha \pi^{1.5} \sigma^3 e^{i\mathbf{q} \cdot \mathbf{R}} e^{-(\sigma|\mathbf{q}|/2)^2} \quad (\text{S1})$$

to obtain the relationship between real-space parameters and q-space ones (which are the actual input to the calculations):  $a = \alpha \pi^{1.5} \sigma^3$ ,  $b = \sigma/2$ , and  $c = \gamma$ .

**Table S 1: Model ligand parameters used to passivate surface Ga atoms. The parameters relative to the anion passivation [ $a_1 = -1$ ,  $b_1 = 0.7$ ,  $c_1 = 0.2$ ,  $a_2 = -1$ ,  $b_2 = 0.9$ ,  $c_2 = 0.2$ , where the subscript refers to the number of dangling bonds] were kept constant for all ligands.**

| Ligand | cation                       |     |      |                               |      |      |
|--------|------------------------------|-----|------|-------------------------------|------|------|
|        | 1 dangling bond <sup>†</sup> |     |      | 2 dangling bonds <sup>†</sup> |      |      |
|        | a                            | b   | c    | a                             | b    | c    |
| A      | 2.00                         | 0.1 | 0.70 | 2.00                          | 0.50 | 0.60 |
| B      | 1.68                         | 0.8 | 0.55 | 1.68                          | 0.33 | 0.25 |
| C      | 3.00                         | 0.8 | 0.55 | 1.68                          | 0.33 | 0.25 |
| D      | 3.00                         | 0.8 | 0.55 | 4.00                          | 0.33 | 0.25 |
| E      | 3.00                         | 0.8 | 0.45 | 6.00                          | 0.33 | 0.25 |
| F      | 3.00                         | 0.8 | 0.35 | 1.68                          | 0.33 | 0.25 |

<sup>†</sup> Surface atoms may have one or two dangling bonds that need passivating (see main text for details)

# Method

The single-particle energies and wave functions ( $E_v, \psi_v$  and  $E_c, \psi_c$  for valence (v) and conduction (c) bands, respectively) are calculated using the plane-wave atomistic semiempirical pseudopotential method described in Reference,<sup>2</sup> including spin-orbit coupling (we use the GaSb pseudopotentials derived by Magri and Zunger<sup>3</sup>).

The reciprocal space decomposition of the CBM is obtained by expanding its wave function  $\psi_{cbm}(\vec{r})$  as a superposition of bulk Bloch states  $u_{n,\vec{k}}(\vec{r})e^{i\vec{k}\cdot\vec{r}}$  and summing over all bands at a given wave vector  $\vec{k}$ <sup>4</sup>

$$P_{cbm}(\vec{k}) = \sum_{n=1}^{N_{bands}} \left| \langle \psi_{cbm}(\vec{r}) | u_{n,\vec{k}}(\vec{r}) e^{i\vec{k}\cdot\vec{r}} \rangle \right|^2 \quad (S2)$$

The contributions  $c_{\vec{k}}$  from the high-symmetry points (HSP)  $\Gamma$ , L and X are calculated by summing  $P_{cbm}(\vec{k})$  over all  $\vec{k}$  points within a Voronoi cell  $V_{HSP}$  centred on the specific HSP,<sup>5</sup> as

$$c_{HSP} = 100 \sum_{\vec{k} \in V_{HSP}} P_{cbm}(\vec{k}), \quad (S3)$$

(where HSP= $\Gamma$ , L or X).

The radiative lifetime for the transition  $a \rightarrow b$  are obtained in the framework of the standard time-dependent perturbation theory as:<sup>10</sup>

$$\left( \frac{1}{\tau_R} \right)_{a,b} = \frac{4nF\alpha'\omega^3}{3c^2} |M_{a,b}|^2 \quad (S4)$$

where  $n$  is the refractive index of the medium surrounding the nanocrystal (here we assume toluene),  $F = 3\epsilon / (\epsilon_{NQD} + 2\epsilon)$  is the screening factor (here  $\epsilon = n^2$ , and  $\epsilon_{NQD}$  is the size-dependent dielectric constant of the NQD, calculated using a modified Penn model<sup>11</sup>),  $\alpha'$  is the fine structure constant,  $\hbar\omega$  is the energy of the photon,  $c$  is the speed of light in the vacuum, and  $M_{a,b}$  is the excitonic dipole matrix element

$$M_{a,b} = \sum_{v,c} C_{v,c}^{(a)} C_{v,c}^{(b)} \langle \psi_v | \vec{r} | \psi_c \rangle, \quad (S5)$$

where the excitonic wave functions  $\{\Psi^{(\beta)}\}$  are expanded in terms of single-substitution Slater determinants  $\{\Phi_{v,c}\}$  constructed from the single-particle conduction (c) and valence (v) wave functions and the many-body Hamiltonian is solved within the framework of the Configuration Interaction (CI) scheme, where we use a position-dependent screening for the direct and exchange Coulomb integrals.<sup>11</sup> Room temperature thermally averaged lifetimes are calculated by assuming Boltzmann occupation of the excitonic levels.

Auger recombination rates were calculated within the standard time-dependent perturbation theory according to the formalism developed in ref.<sup>12</sup> following the procedure detailed in ref.,<sup>13</sup> where in the regional screening used in the calculation of the AR integrals a value of 2.4 (toluene) was assumed for the dielectric constant outside the dot and a Lorentzian broadening of 10 meV was used.

## Charge Density Profile

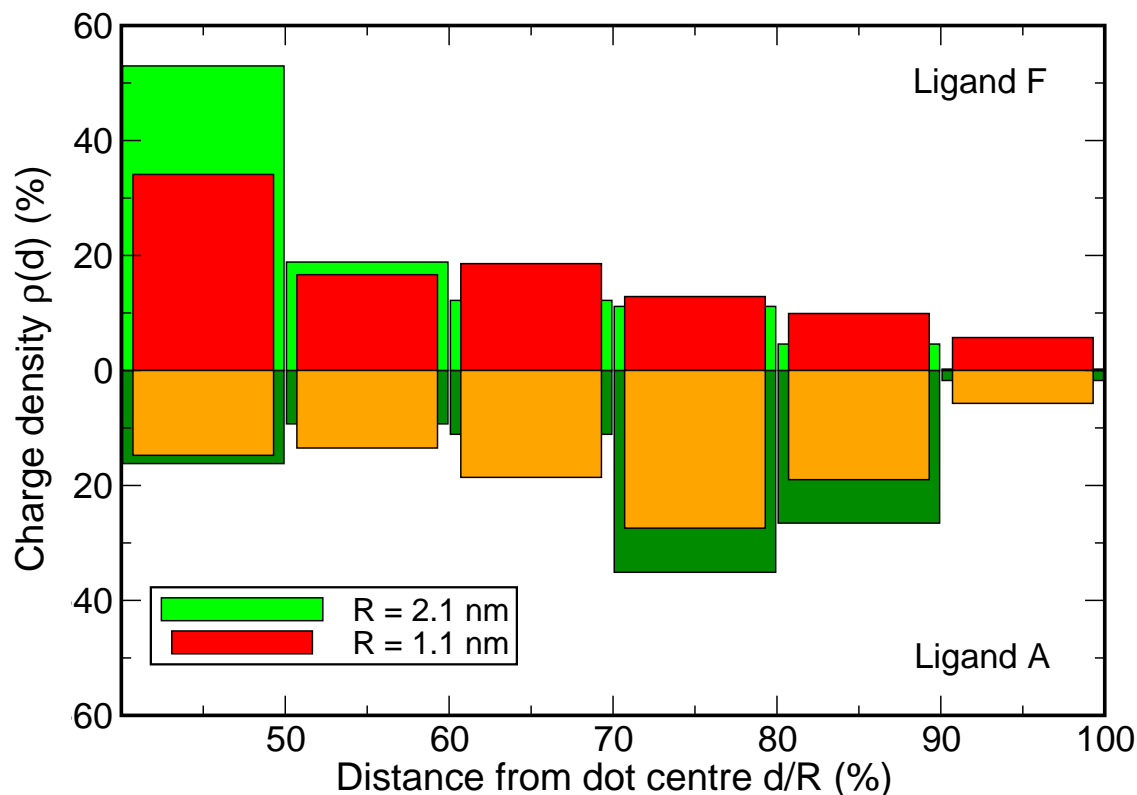

S 1: Charge density profiles for NQDs capped with ligands A and F: charge density contained in equally spaced regions (spherical shells) at different distances  $d$  from the nanocrystal centre (expressed as fractions of the total radius  $R$ ): the first bar refers to the charge density contained in a sphere with radius  $r = R/2$  (i.e.,  $d \leq 50\%R$  - the value reported in Fig. 2); the following bars show the density contained in 5 equally spaced spherical shells of width  $0.1R$ , with inner radii ranging from  $50\%R$  to  $90\%R$  and outer radii from  $60\%R$  to  $100\%R$ . It is apparent that ligand F leads to a larger concentration of the charge density in the dot core, with about 70% [50%] of the charge located within a sphere with radius  $0.6R$  for  $R = 2.1$  nm [ $R = 1.1$  nm], whereas ligand A exhibits a larger attraction for the electron, with about 60% [50%] of the charge located between  $0.7R$  and  $0.9R$  for the same size.

# Symmetry of the band edge wave functions and character of the ground state excitonic transitions

We find the CBM envelope function of the  $R = 2.1$  nm dot to be  $a_1$  (i.e.,  $s$ -like) for dots capped with ligands A - D, yielding a total orbital symmetry  $a_1 = \Gamma_{1c} \times a_1(s)$ , for A, and  $a_1 = L_{1c} \times a_1(s)$ , for B - D. The VBM envelope is found instead to be  $s$ -like only for ligand A, yielding an orbital symmetry  $t_2 = \Gamma_{15v} \times a_1(s)$ , whereas its symmetry is  $p$ -like for all other ligands, with orbital symmetry  $t_1 = \Gamma_{15v} \times t_2(p)$ . Here  $\Gamma_{15v}$ ,  $\Gamma_{1c}$ , and  $L_{1c}$  represent the symmetry of the underlying bulk Bloch functions (which transform like  $t_2$ ,  $a_1$  and  $a_1$ , respectively), whereas  $a_1$ ,  $t_2$ , etc. are the envelope functions (which are  $s$ -like and  $p$ -like). Although we include spin-orbit coupling in our calculations, for simplicity we used here the notation relative to  $\Delta_{so} = 0$ . In the presence of spin-orbit  $\gamma_8(t_2)$ ,  $\gamma_8(t_1)$  and  $\gamma_8(e)$  are mixed, so that what we refer to as a state with  $t_2$  symmetry has some smaller  $t_1$  and  $e$  component, and the same applies for  $t_1$ . Further details on the symmetries in NQDs made of zinc-blende materials can be found in ref.<sup>14</sup>

These symmetries result in specific rules for the optical transitions in these systems, as they alter the allowed/forbidden character of the excitonic states that receive contributions from the band edges.

If the VBM is 2-fold degenerate with an overall  $\gamma_{8v}(t_2)$  symmetry and the 2-fold degenerate CBM has an overall  $\gamma_{6c}(a_1)$  symmetry, the ground state exciton is 5-fold degenerate and dark. The next exciton derived from the band edges is 3-fold degenerate and bright. If, however, the VBM has an overall  $\gamma_{8v}(t_1)$  symmetry, while the CBM is still  $\gamma_{6c}(a_1)$ , the ground state exciton has instead a dipole-allowed component, yielding a partially allowed, 3-fold degenerate, ground exciton, with a much longer lifetime than a fully allowed, bright exciton. Finally with a  $\gamma_{8v}(t_1)$  VBM and a  $\gamma_{8c}(t_2)$  CBM, we find the lowest 100 exciton states to be dark.

## Radiative Lifetime

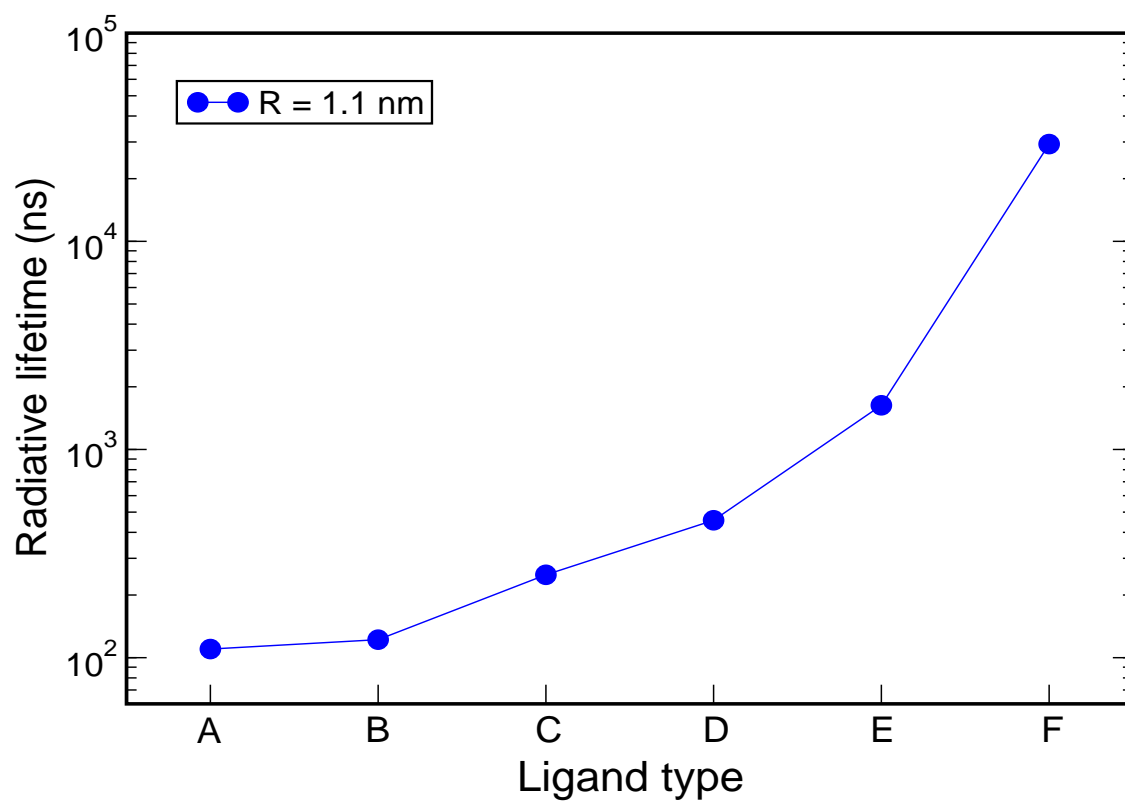

S 2: Radiative lifetimes calculated for NQDs with  $R = 1.1$  nm capped with ligands A to F.

# Auger Electron Cooling times

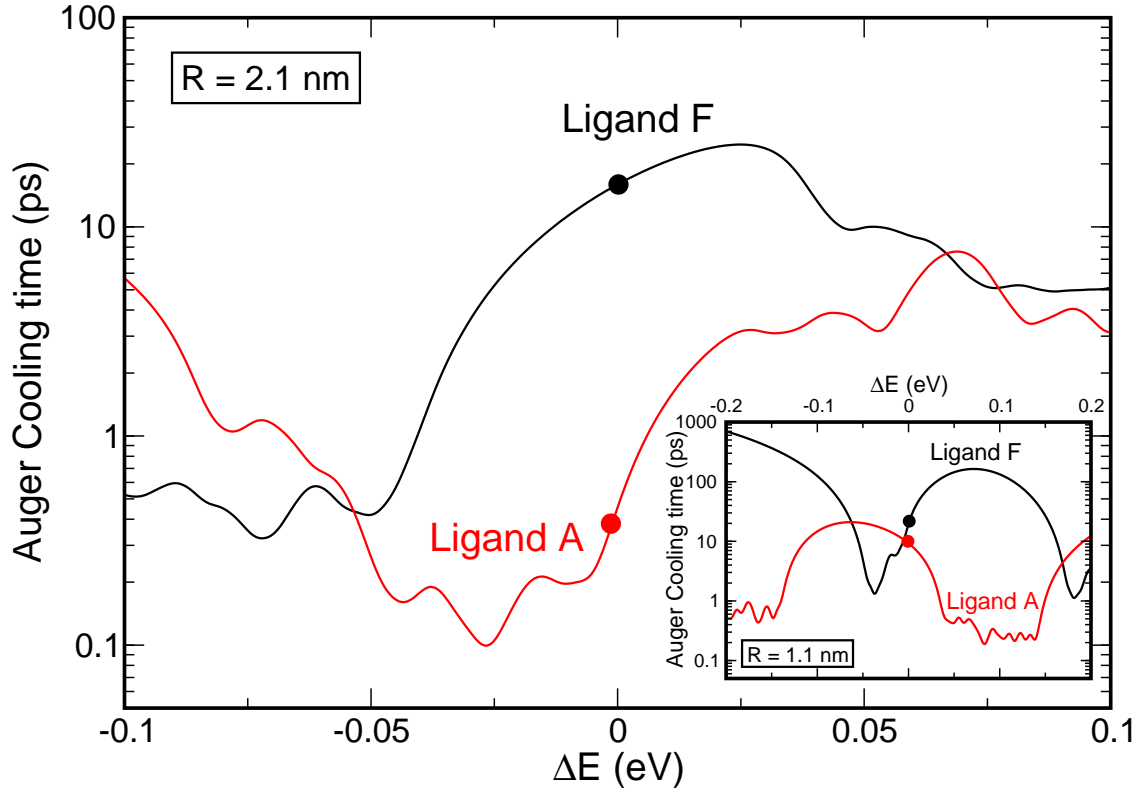

S 3: AC times calculated for NQDs with  $R = 2.1$  nm (main frame) and  $R = 1.1$  nm (inset) capped with ligands A and F: F-capped nanocrystals exhibit increases in the AC times of over one order of magnitude compared to A-terminated dots, for larger sizes; although at  $\Delta E = 0$  the reduction is small (a factor of 2) in  $R = 1.1$  nm nanostructures, due to the strongly oscillating character of the results, the AC suppression can approach 3 orders of magnitude in these dots.

## References

- (1) Graf, P.A.; Kim, K.; Jones, W.B.; Wang, L.W. Surface Passivation Optimization Using DIRECT. *J. Comp. Phys.* **2007**, *224*, 824-835.
- (2) Wang, L.-W.; Zunger, A. Local-Density-Derived Semiempirical Pseudopotentials. *Phys. Rev. B* **1995**, *51*, 17 398.

- (3) Magri, R.; Zunger, A. Effects of Interfacial Atomic Segregation and Intermixing on the Electronic Properties of InAs/GaSb Superlattices. *Phys. Rev. B* **2002**, *65*, 165302.
- (4) Wang, L.-W.; Bellaiche, L.; Wei, S. H.; Zunger, A. "Majority Representation" of Alloy Electronic States. *Phys. Rev. Lett.* **1998**, *80*, 4725.
- (5) Following the procedure used in Ref.,<sup>6</sup> the nanocrystal's Brillouin zone was partitioned using the high symmetry points  $\Gamma$ , L and X as seeds for non-overlapping Voronoi cells<sup>7-9</sup> in reciprocal space, having the property that each wave vector  $k$  in any particular cell is closer to the specific high-symmetry point than to any other.
- (6) Sills, A.; Harrison, P.; Califano, M. Exciton Dynamics in InSb Colloidal Quantum Dots. *J. Phys. Chem. Lett.* **2015**, *7*, 31-35
- (7) Aurenhammer, F. Voronoi Diagrams - A Survey of a Fundamental Geometric Data Structure. *ACM Computing Surveys* **1991**, *23*, 345-405.
- (8) Okabe, A.; Boots, B.; Sugihara, K.; Chiu, S. N. *Spatial Tessellations - Concepts and Applications of Voronoi Diagrams*. 2nd edition. John Wiley, 2000, ISBN 0-471-98635-6.
- (9) Tran, Q.T.; Tainar, D.; Safar, M. *Transactions on Large-Scale Data- and Knowledge-Centered Systems*, **2009**, ISBN 9783642037214.
- (10) Dexter, D. L. *Solid State Physics* **1958** (Academic Press Inc., New York), vol. 6, p. 358-361.
- (11) Franceschetti, A.; Fu, H.; Wang, L.-W. & Zunger, A. Many-Body Pseudopotential Theory of Excitons in InP and CdSe Quantum Dots. *Phys. Rev. B* **1999**, *60*, 1819-1829.
- (12) Wang, L.-W.; Califano, M.; Franceschetti, A.; Zunger, A. Pseudopotential Theory of Auger Processes in CdSe Quantum Dots. *Phys. Rev. Lett.* **2003**, *91*, 056404-1 - 056404-4.
- (13) Califano, M. Direct and Inverse Auger Processes in InAs Nanocrystals: Can the Decay Signature of a Trion Be Mistaken for Carrier Multiplication? *ACS Nano* **2009**, *3*, 2706-2714.
- (14) Yu, P.Y.; Cardona, M. *Fundamentals of Semiconductors: Physics and Materials Properties*. 4th edition. Springer Berlin Heidelberg, **2010**, ISBN 978-3-642-00709-5.
